# Supplementary material for: Past Sodium Intake, Contemporary Sodium Intake, and Cardiometabolic Health in Southwest Coastal Bangladesh
Source: PubMed Central journal article supplement (PMC7727005; doi:10.1161/jaha.119.014978), 2020-09-02
Supplement: JAH3-9-e014978-s001.pdf [file JAH3-9-e014978-s001.pdf]

# **SUPPLEMENTAL MATERIAL**

**Figure S1. Working hypothesis on how sodium intake is linked to type 2 diabetes and insulin sensitivity.**

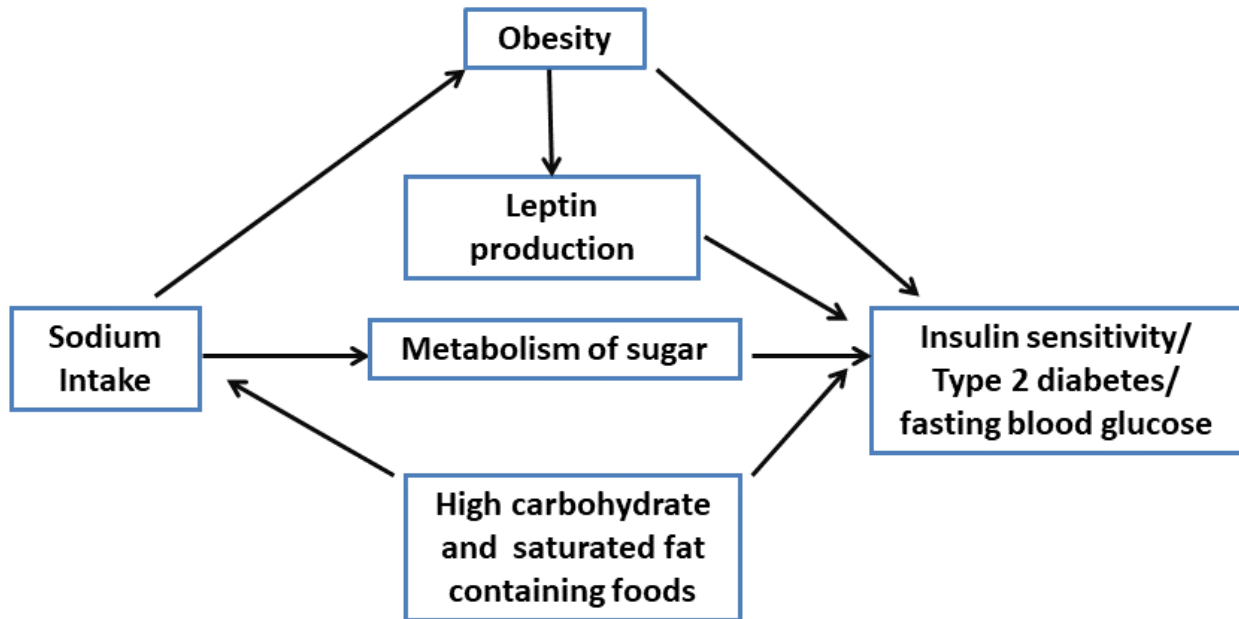

**Figure S2. Sensitivity analyses—restricted cubic spline plots (solid lines) and 95% confidence interval (dashed lines) for past versus contemporary Na exposure and cardiometabolic biomarker relationships when the overweight and obese participants and those with large waist circumference were excluded from analyses.**

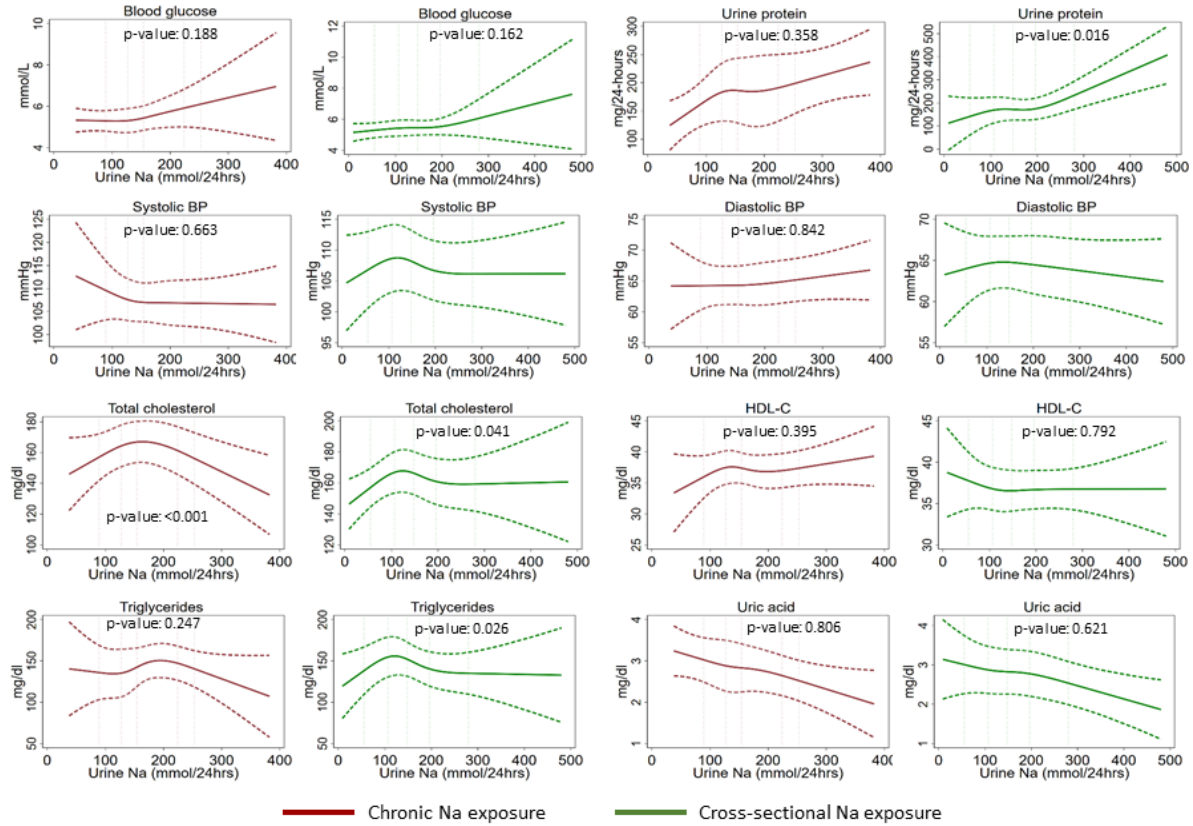

Plots were adjusted for age, sex, smoking, physical activities, alcohol consumption, sleep hour, religion and household wealth. The five vertical lines indicate the 10<sup>th</sup>, 25<sup>th</sup>, 50<sup>th</sup>, 75<sup>th</sup> and 90<sup>th</sup> percentiles of 24-hour urine Na distribution.

**Figure S3. Sensitivity analyses—restricted cubic spline plot (solid line) and 95% confidence interval (dashed lines) for past versus contemporary Na exposure and fasting blood glucose relationship when the analyses were restricted among non-diabetic participants.**

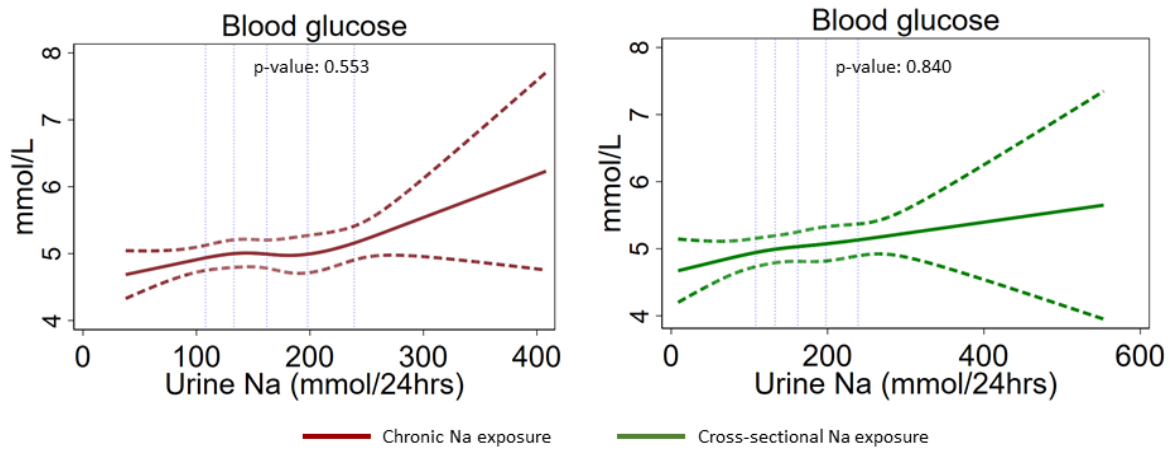

Plots were adjusted for age, sex, BMI, smoking, physical activities, alcohol consumption, sleep hour, religion and household wealth. The five vertical lines indicate the 10<sup>th</sup>, 25<sup>th</sup>, 50<sup>th</sup>, 75<sup>th</sup> and 90<sup>th</sup> percentiles of 24-hour urine Na distribution.
